# Supplementary material for: Pilot-scale in situ bioremediation of HMX and RDX in soil pore water in Hawaii
Source: Royal Society of Chemistry journal article supplement (doi:10.1039/c3em00320e), 2013-01-01
Supplement: c3em00320e_3.pdf [file c3em00320e_3.pdf]

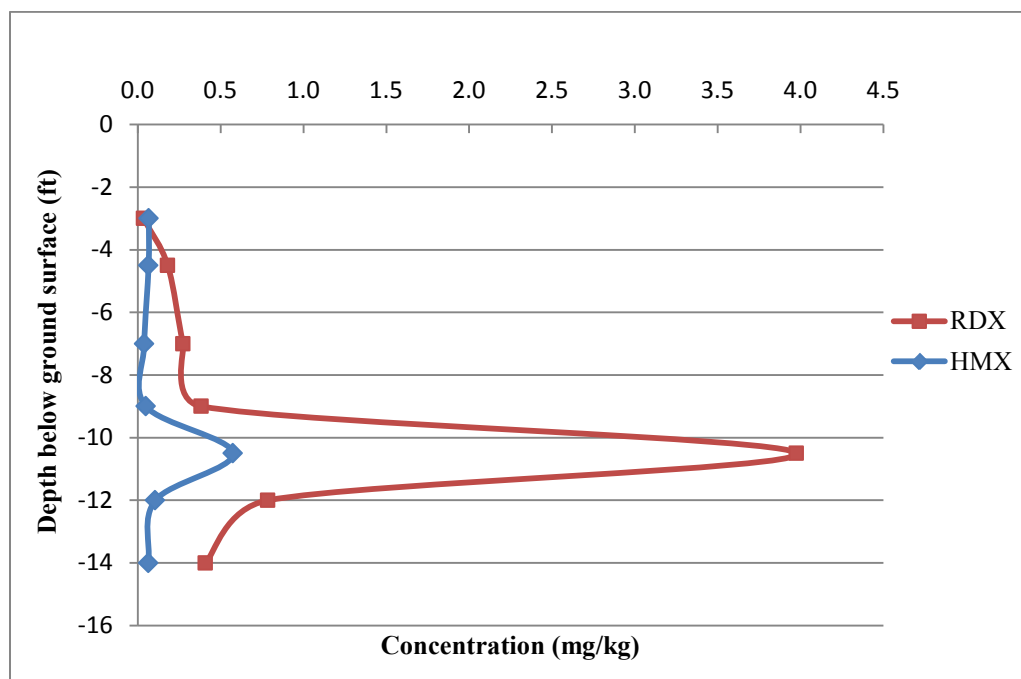

Figure S3: Background concentration profile of HMX and RDX in soil from bore hole 1 (C1) of the control plot

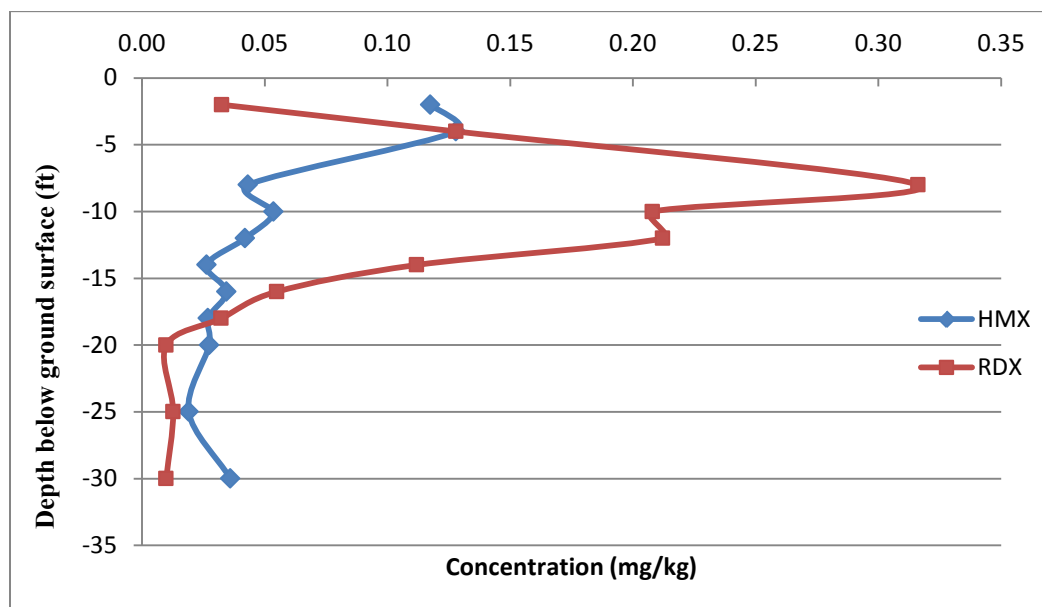

Figure S4: Background concentration profile of HMX and RDX in soil from bore hole 3 (C3) of the control plot

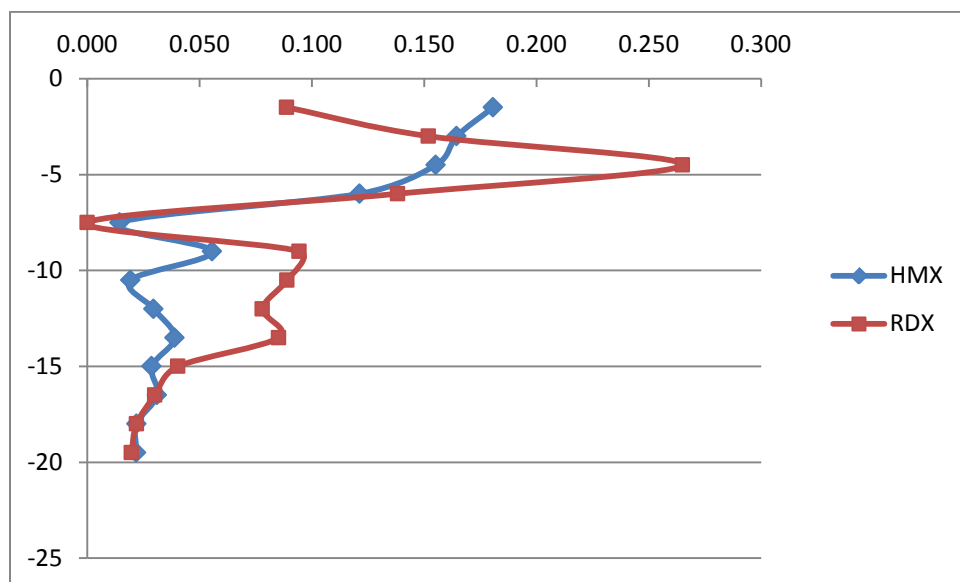

Figure S5: Background concentration profile of HMX and RDX in soil from bore hole 1 (T1) of the treatment plot

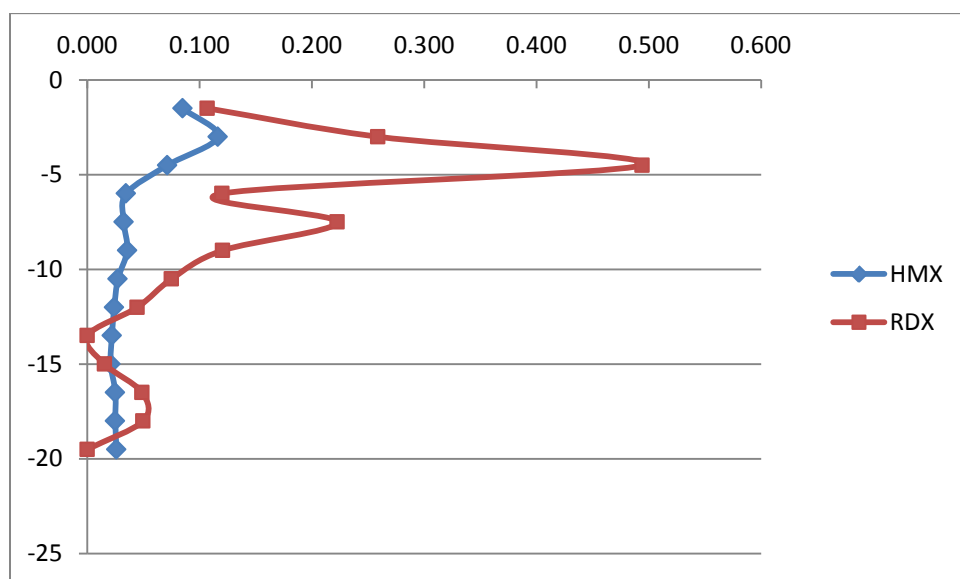

Figure S6: Background concentration profile of HMX and RDX in soil from bore hole 2 (T2) of the treatment plot

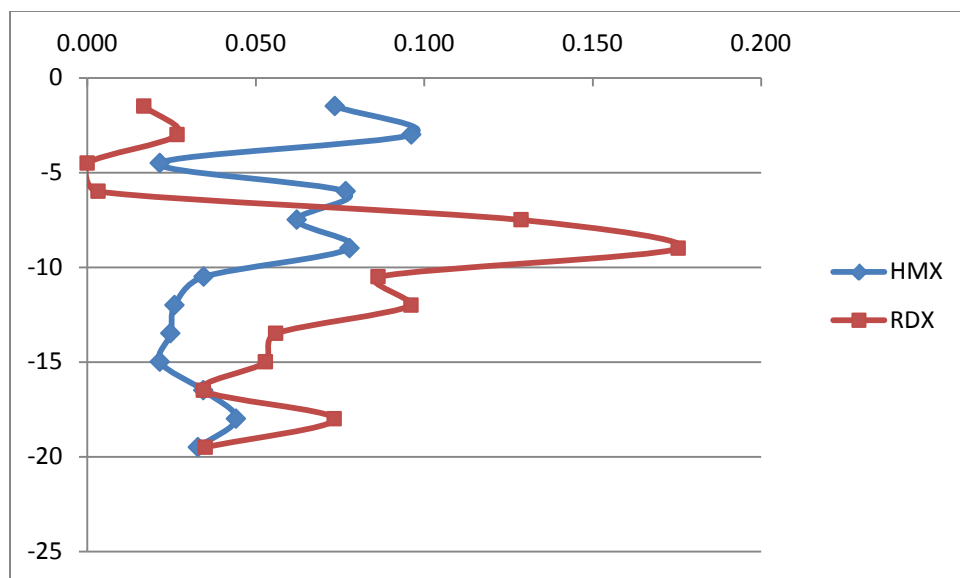

Figure S7: Background concentration profile of HMX and RDX in soil from bore hole 3 (T3) of the treatment plot
